# Supplementary material for: Investigating the epidemiology of medication errors and error-related adverse drug events (ADEs) in primary care, ambulatory care and home settings: a systematic review protocol
Source: PubMed Central journal article supplement — BMJ Open. 2016 Aug 31;6(8):e010675. doi: 10.1136/bmjopen-2015-010675 (PMC5013338; doi:10.1136/bmjopen-2015-010675), 2016-08-31
Supplement: bmjopen-2015-010675supp_appendix.pdf [file bmjopen-2015-010675supp_appendix.pdf]

## Appendix 1: Search strategies

### A. MEDLINE

1. Medication Errors/ae, cl, mt [Adverse Effects, Classification, Methods]
2. "Drug-Related Side Effects and Adverse Reactions"/
3. adverse drug event\*.mp.
4. medication error\*.mp.
5. Patient Safety/
6. drug safety.mp.
7. medication safety.mp.
8. prescribed medication\*.mp.
9. prescribed drug\*.mp.
10. Nonprescription Drugs/
11. over the counter medication\*.mp.
12. patient error\*.mp.
13. medication management.mp.
14. Medication Therapy Management/
15. drug related problem\*.mp.
16. medication related problem\*.mp.
17. preventable adverse drug event\*.mp.
18. preventable adverse event\*.mp.
19. potential adverse event\*.mp.
20. ((medic\* or drug\*) adj3 (error\* or problem\* or event\* or safety)).mp.
21. 1 or 2 or 3 or 4 or 5 or 6 or 7 or 8 or 9 or 10 or 11 or 12 or 13 or 14 or 15 or 16 or 17 or 18 or 19 or 20
22. household\*.mp.
23. residence\*.mp.
24. residential home.mp.

25. ambulatory care.mp.
26. Outpatients/
27. self care/ or self medication/ or self manage\*.mp.
28. After-Hours Care/
29. out of hours medical care.mp.
30. Homebound Persons/
31. home visit.mp.
32. face to face home interview.mp.
33. face to face interview.mp.
34. Primary Health Care/
35. General Practice/
36. Family Practice/
37. Patient-Centered Care/
38. ((home\* or house\* or community or ambulatory or primary or family or outpatient) adj3 (setting\* or context\*)).mp.
39. ((after or post) adj2 hospital discharge).mp.
40. 22 or 23 or 24 or 25 or 26 or 27 or 28 or 29 or 30 or 31 or 32 or 33 or 34 or 35 or 36 or 37 or 38 or 39
41. Epidemiology/
42. Prevalence/
43. Incidence/
44. risk factor\*.mp.
45. follow up.mp.
46. cross sectional.mp.
47. cohort.mp.
48. case control.mp.
49. observational.mp.
50. 41 or 42 or 43 or 44 or 45 or 46 or 47 or 48 or 49

51. 21 and 40 and 50

52. limit 51 to (humans and yr="1990 -2015")

## **B. EMBASE**

1. adverse drug event\*.mp.

2. medication error/

3. patient safety/

4. drug safety/

5. medication safety.mp.

6. prescription drug/

7. prescribed medication\*.mp.

8. non prescription drug/

9. over the counter medication\*.mp. [mp=title, abstract, heading word, drug trade name, original title, device manufacturer, drug manufacturer, device trade name, keyword]

10. patient error\*.mp.

11. medication therapy management/

12. medication management.mp.

13. drug related problem\*.mp.

14. medication related problem\*.mp.

15. preventable adverse drug event\*.mp.

16. preventable adverse event\*.mp.

17. potential adverse drug event\*.mp.

18. ((medic\* or drug\*) adj3 (error\* or problem\* or event\* or safety)).mp.

19. 1 or 2 or 3 or 4 or 5 or 6 or 7 or 8 or 9 or 10 or 11 or 12 or 13 or 14 or 15 or 16 or 17 or 18

20. household\*.mp.

21. residence\*.mp.

22. ambulatory care/
23. outpatient care/ or outpatient/
24. self care/
25. self medication/
26. self manage\*.mp.
27. after hours care.mp.
28. out of hours medical care.mp.
29. home visit.mp.
30. interview/ or face to face interview.mp.
31. primary health care/
32. general practice/
33. patient centered care.mp. or patient care/
34. family practice.mp.
35. ((after or post) adj2 hospital discharge).mp.
36. ((home\* or house\* or community or ambulatory or primary or family or outpatient) adj3 (setting\* or context\*)).mp.
37. 20 or 21 or 22 or 23 or 24 or 25 or 26 or 27 or 28 or 29 or 30 or 31 or 32 or 33 or 34 or 35 or 36
38. epidemiology/
39. prevalence/
40. incidence/
41. risk factor\*.mp.
42. follow up/
43. observational method/
44. cross-sectional study/ or cross sectional.mp.
45. cohort.mp.
46. case control study/ or case control.mp.
47. 38 or 39 or 40 or 41 or 42 or 43 or 44 or 45 or 46

48. 19 and 37 and 47

49. limit 48 to (human and yr="1990 -2015")

### **C. PsycINFO**

1. medication error\*.mp.

2. adverse drug event\*.mp.

3. drug related adverse event\*.mp.

4. patient safety.mp.

5. drug safety.mp.

6. medication safety.mp.

7. exp Prescription Drugs/ or exp "Prescribing (Drugs)"/

8. prescribed medication\*.mp.

9. exp Nonprescription Drugs/

10. over the counter medication\*.mp.

11. patient error\*.mp.

12. medication management.mp.

13. medication therapy management.mp.

14. drug related problem\*.mp.

15. medication related problem\*.mp.

16. preventable adverse event\*.mp.

17. preventable adverse drug event\*.mp.

18. potential adverse event\*.mp.

19. ((medic\* or drug\*) adj3 (error\* or problem\* or event\* or safety)).mp.

20. 1 or 2 or 3 or 4 or 5 or 6 or 7 or 8 or 9 or 10 or 11 or 12 or 13 or 14 or 15 or 16 or 17 or 18 or 19

21. household\*.mp.

22. residence\*.mp.
23. residential home.mp.
24. ambulatory care.mp.
25. exp Outpatients/
26. self care.mp.
27. exp Self Medication/
28. exp Self Management/
29. after hours care.mp.
30. home visit.mp.
31. exp Home Visiting Programs/
32. exp Interviews/ or face to face interview.mp.
33. exp Primary Health Care/
34. exp General Practitioners/ or general practice.mp.
35. family practice.mp.
36. patient centered care.mp.
37. ((after or post) adj2 hospital discharge).mp.
38. ((home\* or house\* or community or ambulatory or primary or family or outpatient) adj3 (setting\* or context\*)).mp.
39. 21 or 22 or 23 or 24 or 25 or 26 or 27 or 28 or 29 or 30 or 31 or 32 or 33 or 34 or 35 or 36 or 37 or 38
40. exp Epidemiology/
41. incidence.mp.
42. prevalence.mp.
43. risk factor\*.mp.
44. follow up.mp.
45. exp Observation Methods/
46. cross sectional.mp.
47. cohort.mp.

48. case control.mp.

49. 40 or 41 or 42 or 43 or 44 or 45 or 46 or 47 or 48

50. 20 and 39 and 49

51. limit 50 to (human and yr="1990 -2015")

#### D. Web of Science

|     |                                                                                                                                                                                                                                                                                                                                                                                                                                                                                                                                                                                                                                                                                                                                                        |
|-----|--------------------------------------------------------------------------------------------------------------------------------------------------------------------------------------------------------------------------------------------------------------------------------------------------------------------------------------------------------------------------------------------------------------------------------------------------------------------------------------------------------------------------------------------------------------------------------------------------------------------------------------------------------------------------------------------------------------------------------------------------------|
| # 5 | #4 AND #3 AND #2 AND #1<br><br>Indexes=SCI-EXPANDED, SSCI, A&HCI, CPCI-S, CPCI-SSH, BKCI-S, BKCI-SSH, CCR-EXPANDED, IC Timespan=1990-2015                                                                                                                                                                                                                                                                                                                                                                                                                                                                                                                                                                                                              |
| # 4 | TS=(follow up) OR TS=(cross sectional) OR TS=(cohort) OR TS=(case control) OR TS=(observational study)<br><br>Indexes=SCI-EXPANDED, SSCI, A&HCI, CPCI-S, CPCI-SSH, BKCI-S, BKCI-SSH, CCR-EXPANDED, IC Timespan=1990-2015                                                                                                                                                                                                                                                                                                                                                                                                                                                                                                                               |
| # 3 | TS=(epidemiology) OR TS=(incidence) OR TS=(prevalence) OR TS=(risk factor*)<br><br>Indexes=SCI-EXPANDED, SSCI, A&HCI, CPCI-S, CPCI-SSH, BKCI-S, BKCI-SSH, CCR-EXPANDED, IC Timespan=1990-2015                                                                                                                                                                                                                                                                                                                                                                                                                                                                                                                                                          |
| # 2 | <b>TOPIC:</b> (household) <i>OR</i> <b>TOPIC:</b> (residence) <i>OR</i> <b>TOPIC:</b> (ambulatory) <i>OR</i> <b>TOPIC:</b> (community) <i>OR</i> <b>TOPIC:</b> (outpatient) <i>OR</i> <b>TOPIC:</b> (general practice) <i>OR</i> <b>TOPIC:</b> (family practice) <i>OR</i> <b>TOPIC:</b> (primary health care) <i>OR</i> <b>TOPIC:</b> (patient centered care) <i>OR</i> <b>TOPIC:</b> (self care) <i>OR</i> <b>TOPIC:</b> (self manage*) <i>OR</i> <b>TOPIC:</b> (self medication*) <i>OR</i> <b>TOPIC:</b> (after hours care) <i>OR</i> <b>TOPIC:</b> (after hospital discharge) <i>OR</i> <b>TOPIC:</b> (post hospital discharge)<br><br>Indexes=SCI-EXPANDED, SSCI, A&HCI, CPCI-S, CPCI-SSH, BKCI-S, BKCI-SSH, CCR-EXPANDED, IC Timespan=1990-2015 |
| #1  | <b>TOPIC:</b> (medication error*) <i>OR</i> <b>TOPIC:</b> (adverse drug event*) <i>OR</i> <b>TOPIC:</b> (drug related adverse event*) <i>OR</i> <b>TOPIC:</b> (medication related adverse event*) <i>OR</i> <b>TOPIC:</b> (patient safety) <i>OR</i> <b>TOPIC:</b> (drug safety) <i>OR</i> <b>TOPIC:</b> (patient error*) <i>OR</i> <b>TOPIC:</b> (drug related problem*) <i>OR</i> <b>TOPIC:</b> (preventable adverse drug event*) <i>OR</i>                                                                                                                                                                                                                                                                                                          |

**TOPIC:** (potential adverse drug event\*)  
 Indexes=SCI-EXPANDED, SSCI, A&HCI, CPCI-S, CPCI-SSH,  
 BKCI-S, BKCI-SSH, CCR-EXPANDED, IC Timespan=1990-2015

**E. CINAHL**

|     |                                                                     |
|-----|---------------------------------------------------------------------|
| S25 | S21 AND S22 AND S23 Limiters – Published Date:<br>19900101-20151031 |
| S24 | S21 AND S22 AND S23                                                 |
| S23 | S14 OR S15 OR S16 OR S17 OR S18 OR S19 OR S20                       |
| S22 | S8 OR S9 OR S10 OR S11 OR S12 OR S13                                |
| S21 | S1 OR S2 OR S3 OR S4 OR S5 OR S6 OR S7                              |
| S20 | (MH "Case Control Studies")                                         |
| S19 | "cohort"                                                            |
| S18 | (MH "Cross Sectional Studies")                                      |
| S17 | (MH "Prospective Studies")                                          |
| S16 | (MH "Risk Factors")                                                 |
| S15 | (MH "Incidence")                                                    |
| S14 | (MH "Prevalence")                                                   |
| S13 | (MH "Family Practice") OR "general practice"                        |
| S12 | (MH "Primary Health Care")                                          |
| S11 | (MH "Self Care")                                                    |
| S10 | (MH "Ambulatory Care")                                              |
| S9  | (MH "Outpatients")                                                  |
| S8  | "household*"                                                        |
| S7  | "medication therapy management"                                     |



|    |                                |
|----|--------------------------------|
| S6 | "drug related problem*"        |
| S5 | "over the counter medication*" |
| S4 | "prescribed medication*"       |
| S3 | "drug safety"                  |
| S2 | (MH "Adverse Drug Event")      |
| S1 | (MH "Medication Errors")       |

**F. Global Health Library (EMRO)**

(Adverse drug event\* OR medication error\* OR patient error\*) AND (outpatient OR ambulatory OR general practice OR family practice OR household OR community OR home visit OR after hospital discharge) AND (prevalence OR incidence OR risk factor\* OR cross sectional OR cohort OR case control)

**G. Google scholar**

(Medication error\* OR adverse drug event\*) AND (home\* OR ambulatory OR community OR outpatient OR general practice OR after discharge) AND (prevalence OR incidence OR risk factor\* OR Cross sectional OR cohort OR case control)
